# Supplementary material for: A comparison of two hyperangulated video laryngoscope blades to direct laryngoscopy in a simulated infant airway: a bicentric, comparative, randomized manikin study
Source: BMC Anesthesiol. 2018 Aug 31;18:119. doi: 10.1186/s12871-018-0580-y (PMC6119241; doi:10.1186/s12871-018-0580-y)
Supplement: Supplementary file 1 — Availibility data. (XLSX 99 kb) [file 12871_2018_580_MOESM1_ESM.xlsx]

## Sheet: Raw Data
Kivi-Study
ID No	Random No	AN-Experience	PCCM Experience	Status	Exp. Ped.	Exp. Weight	Exp. VL	Exp. DL	Scenario	Device	TTBV	TTP	TTV	Success	Failure	Failure R	C&L	POGO	ELM	Lickert-Sc
1	1	40	0	1	2	2	4	4	1	3	5.4	9.5	19.7	1	0		1	100	0	3
1	1	40	0	1	2	2	4	4	1	2	4	12	20	1	0		1	100	0	2
1	1	40	0	1	2	2	4	4	1	1	3.59	6.09	12.24	1	0		1	100	0	1
1	1	40	0	1	2	2	4	4	1	4	6	11	21	1	0		1	100	0	3
1	2	40	0	1	2	2	4	4	2	2	6.2	14.4	25.1	1	0		1	90	0	2
1	2	40	0	1	2	2	4	4	2	3	23	33	38.7	1	0		2	10	0	4
1	2	40	0	1	2	2	4	4	2	1	16.4	21.2	25.2	1	0		2	80	0	2
1	2	40	0	1	2	2	4	4	2	4	9.1	18.2	21.3	1	0		1	100	0	3
2	3	40	0	1	4	1	4	4	1	3	5	10	14	1	0		1	90	0	2
2	3	40	0	1	4	1	4	4	1	2	3	10	18	1	0		1	100	0	2
2	3	40	0	1	4	1	4	4	1	1	4	9	15	1	0		1	100	0	1
2	3	40	0	1	4	1	4	4	1	4	5	10	13	1	0		1	100	0	1
2	4	40	0	1	4	1	4	4	2	2	4.1	12.4	20.3	1	0		1	90	0	2
2	4	40	0	1	4	1	4	4	2	1	14	20	25	1	0		2	50	0	3
2	4	40	0	1	4	1	4	4	2	3	11	16	22	1	0		2	50	0	3
2	4	40	0	1	4	1	4	4	2	4	8	14	19	1	0		1	90	0	2
3	5	11	0	1	1	2	3	3	1	2	10	19	27	1	0		1	100	0	1
3	5	11	0	1	1	2	3	3	1	3	7.58	17.4	21.4	1	0		1	80	0	2
3	5	11	0	1	1	2	3	3	1	1	7	15	20	1	0		2	70	0	2
3	5	11	0	1	1	2	3	3	1	4	4.85	13.2	17.93	1	0		1	100	0	1
3	6	11	0	1	1	2	3	3	2	3	8.9	19.3	25.6	1	0		2	50	0	4
3	6	11	0	1	1	2	3	3	2	4	6.3	15.2	20.4	1	0		1	100	0	1
3	6	11	0	1	1	2	3	3	2	2	3.8	19.6	23.4	1	0		1	100	0	1
3	6	11	0	1	1	2	3	3	2	1	12.8	18	25.6	1	0		2	50	0	4
4	7	24	0	1	2	1	4	4	1	2	4.4	12.1	16.3	1	0		1	100	0	1
4	7	24	0	1	2	1	4	4	1	4	4.5	11.3	15	1	0		1	100	0	2
4	7	24	0	1	2	1	4	4	1	1	4.68	15.7	18	1	0		1	100	0	1
4	7	24	0	1	2	1	4	4	1	3	6.9	15.4	20	1	0		2	40	1	3
4	8	24	0	1	2	1	4	4	2	4	5.8	10.2	13	1	0		1	100	0	1
4	8	24	0	1	2	1	4	4	2	1	10	18.3	20.4	1	0		1	90	0	3
4	8	24	0	1	2	1	4	4	2	3	11.9	21	26	1	0		2	10	1.2	5
4	8	24	0	1	2	1	4	4	2	2	5.6	11.3	15	1	0		1	100	0	2
5	9	18	0	1	2	2	4	3	1	1	3.3	7.3	11.2	1	0		1	100	0	1
5	9	18	0	1	2	2	4	3	1	4	3.04	11.3	15.1	1	0		1	100	0	1
5	9	18	0	1	2	2	4	3	1	2	3.2	8.4	12.6	1	0		1	100	0	1
5	9	18	0	1	2	2	4	3	1	3	6.2	21	27	1	0		2	70	0	4
5	10	18	0	1	2	2	4	3	2	1	7.4	10	15	1	0		1	100	0	1
5	10	18	0	1	2	2	4	3	2	3	6.4	21	32	1	0		2	60	0	5
5	10	18	0	1	2	2	4	3	2	4	6.4	19	24.8	1	0		1	100	0	1
5	10	18	0	1	2	2	4	3	2	2	7.8	18.9	24	1	0		1	100	0	1
6	11	180	0	2	4	1	4	5	1	2	7	11	17	1	0		1	100	0	2
6	11	180	0	2	4	1	4	5	1	3	4	10	14	1	0		1	100	0	1
6	11	180	0	2	4	1	4	5	1	4	4	8	12	1	0		1	100	0	3
6	11	180	0	2	4	1	4	5	1	1	6	10	14	1	0		1	90	0	2
6	12	180	0	2	4	1	4	5	2	3	15	21	28	1	0		2	30	1	4
6	12	180	0	2	4	1	4	5	2	4	6	10	15	1	0		1	100	0	1
6	12	180	0	2	4	1	4	5	2	2	8	14	17	1	0		1	90	0	1
6	12	180	0	2	4	1	4	5	2	1	12	18	23	1	0		1	50	1	3
7	13	21	0	1	2	2	4	4	1	3	13	18	23	1	0		2	70	0	2
7	13	21	0	1	2	2	4	4	1	2	6	11	15	1	0		1	90	0	1
7	13	21	0	1	2	2	4	4	1	4	6	10	14	1	0		1	100	0	3
7	13	21	0	1	2	2	4	4	1	1	9	15	23	1	0		1	90	0	1
7	14	21	0	1	2	2	4	4	2	4	8	14	18	1	0		1	90	0	1
7	14	21	0	1	2	2	4	4	2	1	15	23	30	1	0		2	40	2	3
7	14	21	0	1	2	2	4	4	2	2	10	17	21	1	0		1	90	0	1
7	14	21	0	1	2	2	4	4	2	3	10	15	20	3	2	1	1	100	0	1
8	15	26	0	1	3	2	4	4	1	2	5.4	9.4	13.8	1	0		1	90	0	1
8	15	26	0	1	3	2	4	4	1	1	7	11	15	1	0		1	100	0	1
8	15	26	0	1	3	2	4	4	1	4	4	8	12	1	0		1	100	0	2
8	15	26	0	1	3	2	4	4	1	3	6.3	12.4	15.5	1	0		1	100	0	1
8	16	26	0	1	3	2	4	4	2	3	10	15	22	3	2	1	2	80	0	1
8	16	26	0	1	3	2	4	4	2	4	7	11	15	1	0		1	100	0	1
8	16	26	0	1	3	2	4	4	2	2	9	13	16	1	0		1	90	0	1
8	16	26	0	1	3	2	4	4	2	1	9.3	13.2	18	3	2	1	1	90	0	1
9	17	180	0	2	4	1	4	5	1	1	4.9	9.2	13.3	1	0		1	100	0	2
9	17	180	0	2	4	1	4	5	1	3	3.4	9.4	12.6	1	0		2	80	0	1
9	17	180	0	2	4	1	4	5	1	2	3.2	8.7	13.4	1	0		1	100	0	1
9	17	180	0	2	4	1	4	5	1	4	5.1	15.1	20	1	0		1	100	0	3	Gesichtsfeld zu klein, Sichtverschlechterung am Videobutton
9	18	180	0	2	4	1	4	5	2	3	18.2	30	33	1	0		2	60	0	2
9	18	180	0	2	4	1	4	5	2	2	5.9	12.03	16.4	1	0		1	100	0	1
9	18	180	0	2	4	1	4	5	2	1	8.4	14	16.3	1	0		2	80	0	1
9	18	180	0	2	4	1	4	5	2	4	5.2	12.4	17.1	1	0		1	100	0	1
10	19	22	0	1	2	2	3	4	1	4	3.04	17.4	26.4	1	0		1	100	0	3
10	19	22	0	1	2	2	3	4	1	3	4.3	12.4	16	1	0		1	100	0	2
10	19	22	0	1	2	2	3	4	1	2	3.2	11.3	16.1	1	0		1	90	0	1
10	19	22	0	1	2	2	3	4	1	1	3.4	7.5	12	1	0		2	80	0	1
10	20	22	0	1	2	2	3	4	2	1	3.4	14.5	17.2	1	0		2	70	0	2
10	20	22	0	1	2	2	3	4	2	2	14.5	21	24	1	0		2	40	0	3
10	20	22	0	1	2	2	3	4	2	3	9.4	17.5	24	1	0		2	60	0	3
10	20	22	0	1	2	2	3	4	2	4	5	14.2	19	1	0		1	90	0	1
11	21	30	0	1	3	2	4	4	1	3	5	12	16	1	0		1	90	0	1
11	21	30	0	1	3	2	4	4	1	1	6	11	16	1	0		1	90	0	1
11	21	30	0	1	3	2	4	4	1	2	7.1	11.2	15	1	0		1	90	0	1
11	21	30	0	1	3	2	4	4	1	4	4	8	13	1	0		1	100	0	2
11	22	30	0	1	3	2	4	4	2	3	10	16.5	21.1	3	2	1	1	100	0	1
11	22	30	0	1	3	2	4	4	2	1	15.1	27.2	33.1	2	0	2	2	30	0	4
11	22	30	0	1	3	2	4	4	2	4	6.2	13.1	16.2	1	0		1	100	0	1
11	22	30	0	1	3	2	4	4	2	2	10.2	14.5	19.3	1	0		1	90	0	1
12	23	84	0	2	4	1	4	5	1	4	4	22	34	1	0		1	90	0	2
12	23	84	0	2	4	1	4	5	1	2	5	30	39	1	0		1	100	0	3	Griff zu Groß
12	23	84	0	2	4	1	4	5	1	3	6	10	20	1	0		1	100	0	4
12	23	84	0	2	4	1	4	5	1	1	4	10	19	1	0		1	100	0	1
12	24	84	0	2	4	1	4	5	2	1	4	20	26	1	0		1	100	0	1
12	24	84	0	2	4	1	4	5	2	4	12	34	38	1	0		1	100	0	3
12	24	84	0	2	4	1	4	5	2	3	16	24	33	1	0		2	20	0	4
12	24	84	0	2	4	1	4	5	2	2	5	24	30	2	0	2	1	100	0	2
13	25	27	0	1	2	1	4	4	1	2	3	9	13	1	0		1	100	0	2
13	25	27	0	1	2	1	4	4	1	4	2	7	12	1	0		1	100	0	1
13	25	27	0	1	2	1	4	4	1	1	3	10	13.4	1	0		1	100	0	1
13	25	27	0	1	2	1	4	4	1	3	7	12	16	2	0	1	2	80	1	2
13	26	27	0	1	2	1	4	4	2	3	11	18	23	1	0		2	70	0	2
13	26	27	0	1	2	1	4	4	2	1	4	6	10	1	0		1	90	0	1
13	26	27	0	1	2	1	4	4	2	2	4	9	12	1	0		1	100	0	1
13	26	27	0	1	2	1	4	4	2	4	12	20	25	1	0		1	100	0	1
14	27	21	0	1	2	2	3	3	1	3	7.3	11.4	15.1	1	0		1	90	0	2
14	27	21	0	1	2	2	3	3	1	4	4	11.3	16.2	1	0		1	90	0	2
14	27	21	0	1	2	2	3	3	1	1	5	11	14	1	0		1	100	0	1
14	27	21	0	1	2	2	3	3	1	2	7.3	10.1	13.2	1	0		1	100	0	1
14	28	21	0	1	2	2	3	3	2	4	7.1	11.3	15	1	0		1	100	0	1
14	28	21	0	1	2	2	3	3	2	1	16	22	31	1	0		2	30	0	3
14	28	21	0	1	2	2	3	3	2	2	8.4	12.3	16.4	1	0		2	70	0	2
14	28	21	0	1	2	2	3	3	2	3	8.4	12.3	15.4	2	0	1	2	50	0	3
15	29	40	0	1	3	1	4	5	1	3	7.4	13.4	19	1	0		2	80	0	4
15	29	40	0	1	3	1	4	5	1	1	14.3	21.4	24	1	0		2	30	1.2	3
15	29	40	0	1	3	1	4	5	1	4	7.1	10.4	14	1	0		1	90	0	1
15	29	40	0	1	3	1	4	5	1	2	4.1	7.2	13.4	1	0		1	100	0	1
15	30	40	0	1	3	1	4	5	2	2	6.4	10.3	14.5	1	0		1	90	0	1
15	30	40	0	1	3	1	4	5	2	1	14.4	19.5	26	1	0		1	90	0	3
15	30	40	0	1	3	1	4	5	2	3	17.4	26.5	32	2	0	2	2	20	0	4
15	30	40	0	1	3	1	4	5	2	4	7.1	11.3	15.2	1	0		1	90	0	1
16	31	30	0	1	2	2	4	4	1	3	7	11	14	1	0		1	100	0	1
16	31	30	0	1	2	2	4	4	1	2	4	9	12	1	0		1	90	0	1
16	31	30	0	1	2	2	4	4	1	1	7	12	16	1	0		1	90	0	1
16	31	30	0	1	2	2	4	4	1	4	6	11	13	1	0		1	100	0	2
16	32	30	0	1	2	2	4	4	2	3	17	27	37	2	0	1	2	20	0	4
16	32	30	0	1	2	2	4	4	2	1	12.5	16.5	22.4	1	0		2	30	0	3
16	32	30	0	1	2	2	4	4	2	2	9.4	15.4	19.1	1	0		1	90	0	1
16	32	30	0	1	2	2	4	4	2	4	7.2	10.1	14	1	0		1	100	0	1
17	33	180	0	2	4	1	4	5	1	1	4.43	8.1	10.4	1	0		1	90	0	1
17	33	180	0	2	4	1	4	5	1	2	4.33	9.56	14.8	1	0		1	100	0	1
17	33	180	0	2	4	1	4	5	1	4	2	6.54	10.1	1	0		1	100	0	2
17	33	180	0	2	4	1	4	5	1	3	4.56	14.4	17.3	1	0		2	80	2	2
17	34	180	0	2	4	1	4	5	2	3	5.08	15.6	20.7	1	0		2	40	0	3
17	34	180	0	2	4	1	4	5	2	2	8.6	15.3	22.4	2	0	1	2	50	0	3
17	34	180	0	2	4	1	4	5	2	1	4	8	11	1	0		1	100	0	1
17	34	180	0	2	4	1	4	5	2	4	4.37	8.5	13.4	1	0		1	100	0	1
18	35	64	0	2	4	1	4	5	1	3	7.2	10.1	15.2	1	0		2	80	1	2
18	35	64	0	2	4	1	4	5	1	2	4.6	9.4	13.1	1	0		1	100	0	1
18	35	64	0	2	4	1	4	5	1	4	5.2	8.1	10.4	1	0		1	100	0	2
18	35	64	0	2	4	1	4	5	1	1	5.1	8.7	12.4	1	0		1	90	0	1
18	36	64	0	2	4	1	4	5	2	3	16.4	20.1	23	1	0		2	40	0	3
18	36	64	0	2	4	1	4	5	2	1	12.1	17.4	21	1	0		2	60	0	3
18	36	64	0	2	4	1	4	5	2	4	8.1	11.4	13.1	1	0		1	100	0	1
18	36	64	0	2	4	1	4	5	2	2	9.4	15.3	20.1	1	0		1	90	0	1
19	37	21	0	1	2	2	4	4	1	4	5	12	15	1	0		1	100	0	1
19	37	21	0	1	2	2	4	4	1	3	5	15	18	1	0		2	30	1.2	3
19	37	21	0	1	2	2	4	4	1	2	3	6	13	1	0		1	100	0	1
19	37	21	0	1	2	2	4	4	1	1	3	7	14	1	0		1	100	0	2
19	38	21	0	1	2	2	4	4	2	4	4	12	20	1	0		1	100	0	2
19	38	21	0	1	2	2	4	4	2	3	5	8	17	1	0		2	20	0	3
19	38	21	0	1	2	2	4	4	2	2	2	12	16	1	0		1	100	0	1
19	38	21	0	1	2	2	4	4	2	1	3	6	16	1	0		1	100	0	1
20	39	72	0	2	3	1	4	5	1	3	10.1	15.2	19	1	0		2	70	1	2
20	39	72	0	2	3	1	4	5	1	2	5.6	9.4	12.3	1	0		1	100	0	1
20	39	72	0	2	3	1	4	5	1	4	4.2	8.1	12.4	1	0		1	100	0	2
20	39	72	0	2	3	1	4	5	1	1	5.6	10.4	15.1	1	0		1	100	0	1
20	40	72	0	2	3	1	4	5	2	4	8.2	12.1	15	1	0		1	100	0	1
20	40	72	0	2	3	1	4	5	2	1	13.1	18.2	26.2	1	0		2	60	0	3
20	40	72	0	2	3	1	4	5	2	2	8.4	14.1	18	1	0		1	90	0	1
20	40	72	0	2	3	1	4	5	2	3	10	16	23	1	0		2	50	0	3
21	41	90	0	2	3	1	4	5	1	2	6.5	10.4	15	1	0		1	90	0	1
21	41	90	0	2	3	1	4	5	1	3	7.5	12.1	15.7	1	0		1	90	0	1
21	41	90	0	2	3	1	4	5	1	4	4.1	7.2	10.5	1	0		1	100	0	2
21	41	90	0	2	3	1	4	5	1	1	5.5	8.4	12.4	1	0		1	100	0	1
21	42	90	0	2	3	1	4	5	2	3	16.1	25.7	33.1	2	0	1	2	20	0	4
21	42	90	0	2	3	1	4	5	2	4	7.3	11.2	14.1	1	0		1	100	0	1
21	42	90	0	2	3	1	4	5	2	2	10.2	15.7	20.2	1	0		1	90	0	2
21	42	90	0	2	3	1	4	5	2	1	16.2	24.3	30	2	0	1	2	40	0	3
22	43	26	0	1	2	2	3	4	1	2	6.1	9.3	14.1	1	0		2	80	0	2
22	43	26	0	1	2	2	3	4	1	4	3.2	7.1	11.1	1	0		1	100	0	1
22	43	26	0	1	2	2	3	4	1	1	7.4	10.45	13.2	1	0		1	90	0	1
22	43	26	0	1	2	2	3	4	1	3	7.4	10.1	13.4	1	0		1	90	0	1
22	44	26	0	1	2	2	3	4	2	2	10.2	14.3	19.2	1	0		1	100	0	1
22	44	26	0	1	2	2	3	4	2	4	8.3	10.1	15.2	1	0		1	100	0	1
22	44	26	0	1	2	2	3	4	2	1	7	10.4	13.1	1	0		1	100	0	1
22	44	26	0	1	2	2	3	4	2	3	14.3	20.4	26.2	2	0	1	2	30	0	2
23	45	180	0	2	4	1	4	5	1	4	3.5	7.4	10.1	1	0		1	90	0	1
23	45	180	0	2	4	1	4	5	1	1	8.4	11.2	14.2	1	0		1	90	0	1
23	45	180	0	2	4	1	4	5	1	3	10.1	16.4	26.1	1	0		1	90	0	3
23	45	180	0	2	4	1	4	5	1	2	7.2	9.5	14.1	1	0		1	100	0	1
23	46	180	0	2	4	1	4	5	2	3	9.4	12.5	15.1	3	2	1	2	20	0	1
23	46	180	0	2	4	1	4	5	2	4	8.4	12.2	14.5	1	0		1	90	0	1
23	46	180	0	2	4	1	4	5	2	2	9.4	13.1	15.4	1	0		2	70	0	2
23	46	180	0	2	4	1	4	5	2	1	16.4	23.2	30.1	1	0		2	60	0	2
24	47	16	0	1	1	3	3	3	1	3	10.6	14.5	19.4	1	0		1	90	0	1
24	47	16	0	1	1	3	3	3	1	1	7.2	10.3	14.3	1	0		1	100	0	1
24	47	16	0	1	1	3	3	3	1	4	9.1	13.4	15.4	1	0		1	100	0	3
24	47	16	0	1	1	3	3	3	1	2	15.2	19.1	24.1	1	0		2	60	1	3
24	48	16	0	1	1	3	3	3	2	3	15.7	24.5	31.2	2	0	1	2	40	1	3
24	48	16	0	1	1	3	3	3	2	4	5.4	9.4	13.1	1	0		1	100	0	1
24	48	16	0	1	1	3	3	3	2	2	9.2	14.1	19	1	0		1	90	0	1
24	48	16	0	1	1	3	3	3	2	1	15.1	23.4	30.1	2	0	2	2	50	0	3
25	49	28	0	1	3	2	4	4	1	2	6.4	10.5	15.1	1	0		1	100	0	1
25	49	28	0	1	3	2	4	4	1	4	7.1	11.5	14.3	1	0		1	90	0	3
25	49	28	0	1	3	2	4	4	1	1	11.2	14.5	19	1	0		2	80	1.2	2
25	49	28	0	1	3	2	4	4	1	3	11	15.4	20.4	1	0		2	80	2	3
25	50	28	0	1	3	2	4	4	2	4	5.1	10	14.2	1	0		1	100	0	1
25	50	28	0	1	3	2	4	4	2	2	9.1	11.5	14.6	1	0		1	90	0	2
25	50	28	0	1	3	2	4	4	2	3	16.5	24.6	36.4	1	0		2	40	0	3
25	50	28	0	1	3	2	4	4	2	1	13.4	16	20.1	1	0		2	70	0	2
26	51	22	0	1	3	2	3	4	1	2	7.2	11.5	15.5	1	0		1	90	0	1
26	51	22	0	1	3	2	3	4	1	4	6.4	10.1	12.4	1	0		1	100	0	2
26	51	22	0	1	3	2	3	4	1	3	9.1	14	19.4	1	0		1	90	0	1
26	51	22	0	1	3	2	3	4	1	1	9.2	13.5	16.4	1	0		2	70	0	3
26	52	22	0	1	3	2	3	4	2	4	7.4	10.3	13.1	1	0		1	90	0	1
26	52	22	0	1	3	2	3	4	2	1	11.4	15.4	20.1	1	0		2	80	0	2
26	52	22	0	1	3	2	3	4	2	2	7.5	11.4	14.5	1	0		1	90	0	1
26	52	22	0	1	3	2	3	4	2	3	17.5	24.6	31.2	1	0		2	50	0	3
27	53	64	0	1	3	1	4	5	1	3	9	15.4	20.1	1	0		2	80	0	2
27	53	64	0	1	3	1	4	5	1	1	14.5	19.4	25	1	0		2	70	1	2
27	53	64	0	1	3	1	4	5	1	4	4.3	9.5	12.4	1	0		1	90	0	1
27	53	64	0	1	3	1	4	5	1	2	10.1	16.2	23.1	1	0		1	90	0	1
27	54	64	0	1	3	1	4	5	2	3	15.4	23.2	30.1	2	0	1	2	40	0	3
27	54	64	0	1	3	1	4	5	2	4	6.4	9.5	13.2	1	0		1	90	0	1
27	54	64	0	1	3	1	4	5	2	1	15.2	19.2	26.2	1	0		2	60	0	2
27	54	64	0	1	3	1	4	5	2	2	10.2	17.2	23.1	1	0		2	70	0	2
28	55	16	0	1	2	2	3	3	1	4	5.4	9.4	13	1	0		1	100	0	3
28	55	16	0	1	2	2	3	3	1	3	10.1	15.6	20.4	1	0		2	80	0	2
28	55	16	0	1	2	2	3	3	1	1	9.4	13.4	15.3	1	0		1	90	0	1
28	55	16	0	1	2	2	3	3	1	2	4.3	8.4	12.4	1	0		1	90	0	1
28	56	16	0	1	2	2	3	3	2	4	7.1	9.4	12.4	1	0		1	100	0	1
28	56	16	0	1	2	2	3	3	2	2	7.4	11.2	14.2	1	0		1	100	0	1
28	56	16	0	1	2	2	3	3	2	1	13.5	19.3	26	1	0		1	90	0	2
28	56	16	0	1	2	2	3	3	2	3	16.4	23.5	30.1	2	0	1	2	60	0	3
29	57	21	0	1	3	3	4	4	1	4	6.4	9.5	13.4	1	0		1	100	0	2
29	57	21	0	1	3	3	4	4	1	1	8.4	10.2	14	1	0		1	90	0	1
29	57	21	0	1	3	3	4	4	1	2	9.3	13.1	15	1	0		1	100	0	1
29	57	21	0	1	3	3	4	4	1	3	6.3	9.5	13.1	1	0		1	90	0	2
29	58	21	0	1	3	3	4	4	2	3	15.2	25.1	30	1	0		2	60	0	2
29	58	21	0	1	3	3	4	4	2	4	6.35	9	13.4	1	0		1	100	0	1
29	58	21	0	1	3	3	4	4	2	2	7.5	13.2	19.3	1	0		1	90	0	1
29	58	21	0	1	3	3	4	4	2	1	14.3	20.5	27.1	1	0		2	60	0	3
30	59	33	0	1	3	3	4	4	1	1	7.8	12.4	15	1	0		1	90	0	2
30	59	33	0	1	3	3	4	4	1	3	10.3	14.6	18.7	1	0		1	90	0	2
30	59	33	0	1	3	3	4	4	1	4	7.3	9.2	12.4	1	0		1	90	0	1
30	59	33	0	1	3	3	4	4	1	2	6.4	10.1	14.1	1	0		1	90	0	1
30	60	33	0	1	3	3	4	4	2	3	16.4	25.1	32	1	0		2	40	0	3
30	60	33	0	1	3	3	4	4	2	1	16.4	23.4	30.4	1	0		1	90	0	1
30	60	33	0	1	3	3	4	4	2	4	4.3	9.4	12.3	1	0		1	100	0	1
30	60	33	0	1	3	3	4	4	2	2	8.2	11.4	14.5	1	0		1	90	0	1
31	61	40	0	1	3	1	4	4	1	1	8.4	13.4	16.4	1	0		2	80	0	1
31	61	40	0	1	3	1	4	4	1	2	4.5	9.1	12.1	1	0		1	90	0	1
31	61	40	0	1	3	1	4	4	1	3	9.1	15.1	18.2	1	0		1	100	0	1
31	61	40	0	1	3	1	4	4	1	4	6.4	10.1	13.1	1	0		1	90	0	1
31	62	40	0	1	3	1	4	4	2	4	7.2	10.4	14.2	1	0		1	100	0	1
31	62	40	0	1	3	1	4	4	2	1	16.4	25.1	30.4	1	0		2	80	0	1
31	62	40	0	1	3	1	4	4	2	3	15.3	24.1	29	2	0	2	2	60	0	2
31	62	40	0	1	3	1	4	4	2	2	12.1	16.4	22.4	1	0		2	80	0	2
32	63	84	0	2	4	1	4	4	1	4	6.3	9.4	12.4	1	0		1	100	0	3	Spatel/Sicht
32	63	84	0	2	4	1	4	4	1	1	8.5	12.1	20	1	0		1	90	0	1
32	63	84	0	2	4	1	4	4	1	3	8.2	12.1	18.5	1	0		1	100	0	1
32	63	84	0	2	4	1	4	4	1	2	6.5	12.1	15.4	1	0		1	100	0	1
32	64	84	0	2	4	1	4	4	2	1	10.4	17.2	22	2	0	2	2	40	0	2
32	64	84	0	2	4	1	4	4	2	3	10.4	19.4	25.5	1	0		2	20	0	3
32	64	84	0	2	4	1	4	4	2	4	5.3	10.5	13.4	1	0		1	100	0	1
32	64	84	0	2	4	1	4	4	2	2	8.2	13.5	15.3	1	0		1	90	0	1
33	65	33	0	1	3	1	4	4	1	2	7.33	11.5	14.3	1	0		1	100	0	1
33	65	33	0	1	3	1	4	4	1	1	6.45	9.5	14.1	1	0		1	90	0	1
33	65	33	0	1	3	1	4	4	1	3	5.5	8.4	11.5	1	0		1	100	0	1
33	65	33	0	1	3	1	4	4	1	4	5.3	9.4	14.5	1	0		1	100	0	3
33	66	33	0	1	3	1	4	4	2	4	6.4	10.3	14.1	1	0		1	100	0	1
33	66	33	0	1	3	1	4	4	2	2	9.2	14.1	19.5	1	0		1	100	0	1
33	66	33	0	1	3	1	4	4	2	1	15.4	23.5	29	2	0	1	2	50	0	3
33	66	33	0	1	3	1	4	4	2	3	19.4	30	37.5	2	0	1	2	30	0	4
34	67	44	0	1	3	1	4	5	1	1	4.1	8.56	14.1	1	0		1	100	0	1
34	67	44	0	1	3	1	4	5	1	3	9.2	14.5	20.3	1	0		1	100	0	1
34	67	44	0	1	3	1	4	5	1	2	5.35	8.5	13.4	1	0		1	90	1	1
34	67	44	0	1	3	1	4	5	1	4	7.4	11.45	13.2	1	0		1	100	0	2
34	68	44	0	1	3	1	4	5	2	1	13.2	19.56	25	3	2	1	2	10	0	4
34	68	44	0	1	3	1	4	5	2	2	9.3	15.4	21.4	1	0		1	90	0	1
34	68	44	0	1	3	1	4	5	2	3	14.37	22.4	28.4	1	0		1	90	0	2
34	68	44	0	1	3	1	4	5	2	4	5.1	9.3	14.1	1	0		1	100	0	1
35	69	12	0	1	2	2	3	3	1	1	5.5	9.4	12.1	1	0		1	90	0	1
35	69	12	0	1	2	2	3	3	1	3	4.1	8.5	13.4	1	0		1	100	0	1
35	69	12	0	1	2	2	3	3	1	4	7.4	13.5	15.4	1	0		1	100	0	2
35	69	12	0	1	2	2	3	3	1	2	3.5	8.4	12	1	0		1	100	0	1
35	70	12	0	1	2	2	3	3	2	1	15.5	28.4	33	2	0	2	2	40	0	3
35	70	12	0	1	2	2	3	3	2	3	13.4	24	30.4	1	0		2	70	0	3
35	70	12	0	1	2	2	3	3	2	2	11.2	16.4	21.5	1	0		1	90	0	1
35	70	12	0	1	2	2	3	3	2	4	6.4	9.5	14.5	1	0		1	100	0	1
36	71	38	0	1	3	1	4	4	1	3	4.2	9.5	12.5	1	0		1	100	0	1
36	71	38	0	1	3	1	4	4	1	2	4.3	8.4	11.5	1	0		1	100	0	1
36	71	38	0	1	3	1	4	4	1	4	6.3	9.5	12.1	1	0		1	100	0	2
36	71	38	0	1	3	1	4	4	1	1	5.4	9.4	13.1	1	0		1	90	0	1
36	72	38	0	1	3	1	4	4	2	3	15.65	23.5	30.1	2	0	2	2	50	0	2
36	72	38	0	1	3	1	4	4	2	2	11.1	16.5	21.5	1	0		1	100	0	1
36	72	38	0	1	3	1	4	4	2	1	10.3	16.1	22.4	1	0		2	70	0	2
36	72	38	0	1	3	1	4	4	2	4	7.2	11.4	14.1	1	0		2	80	0	1
37	73	11	0	1	1	2	2	2	1	4	4.5	8.4	11.4	1	0		1	100	0	2
37	73	11	0	1	1	2	2	2	1	1	3.4	8.5	12.4	1	0		1	90	0	1
37	73	11	0	1	1	2	2	2	1	3	6.3	12.1	15	1	0		1	100	0	1
37	73	11	0	1	1	2	2	2	1	2	4.5	8.6	11.3	1	0		1	100	0	1
37	74	11	0	1	1	2	2	2	2	3	15.6	24	35	1	0		2	50	0	3
37	74	11	0	1	1	2	2	2	2	1	10.6	16	23	2	0	1	2	60	0	2
37	74	11	0	1	1	2	2	2	2	2	7.1	11.4	15.3	1	0		1	100	0	1
37	74	11	0	1	1	2	2	2	2	4	6.3	9.4	13.2	1	0		1	100	0	1
38	75	28	0	1	3	1	4	4	1	4	7.3	10.4	15.1	1	0		1	100	0	2
38	75	28	0	1	3	1	4	4	1	1	5.3	9.4	13.4	1	0		1	90	0	1
38	75	28	0	1	3	1	4	4	1	2	3.5	10.1	13.1	1	0		1	100	0	2
38	75	28	0	1	3	1	4	4	1	3	6.2	10.2	14.1	1	0		1	100	0	1
38	76	28	0	1	3	1	4	4	2	2	8.4	15.1	20.4	1	0		1	90	0	1
38	76	28	0	1	3	1	4	4	2	4	5.2	9	12.5	1	0		1	100	0	1
38	76	28	0	1	3	1	4	4	2	1	14.3	19.6	24.4	1	0		2	60	0	3
38	76	28	0	1	3	1	4	4	2	3	15.4	20.1	26.2	2	0	2	2	50	0	3
39	77	90	0	2	4	1	4	5	1	3	6.3	9.4	12.1	1	0		1	100	0	1
39	77	90	0	2	4	1	4	5	1	1	5.5	9	12.4	1	0		1	100	0	1
39	77	90	0	2	4	1	4	5	1	4	6.45	9.3	13.1	1	0		1	100	0	2
39	77	90	0	2	4	1	4	5	1	2	3.6	7.5	10.1	1	0		1	100	0	1
39	78	90	0	2	4	1	4	5	2	4	5.5	9.3	12.35	1	0		1	100	0	1
39	78	90	0	2	4	1	4	5	2	1	13.45	20.5	25.1	1	0		2	60	0	3
39	78	90	0	2	4	1	4	5	2	3	15.3	23.1	27.4	1	0		2	50	0	3
39	78	90	0	2	4	1	4	5	2	2	8.4	14.5	18.4	1	0		1	90	0	1
40	79	18	0	1	2	2	4	3	1	4	7.4	11.3	15.1	1	0		1	100	0	1
40	79	18	0	1	2	2	4	3	1	1	7.5	11.4	15.3	1	0		1	90	0	1
40	79	18	0	1	2	2	4	3	1	2	5.4	9.3	12.3	1	0		1	100	0	1
40	79	18	0	1	2	2	4	3	1	3	6.5	11.1	14.3	1	0		1	100	0	1
40	80	18	0	1	2	2	4	3	2	4	4.5	9.1	12.4	1	0		1	100	0	1
40	80	18	0	1	2	2	4	3	2	2	8.5	15.4	19.3	1	0		1	90	0	1
40	80	18	0	1	2	2	4	3	2	1	10.4	15.1	20	2	0	1	2	50	0	3
40	80	18	0	1	2	2	4	3	2	3	8.1	11.5	14.1	3	2	1	1	90	0	1
41	81	52	0	1	3	1	4	5	1	3	6.5	10.1	14.2	1	0		1	100	0	1
41	81	52	0	1	3	1	4	5	1	2	7.3	10.4	14.4	1	0		1	100	0	1
41	81	52	0	1	3	1	4	5	1	4	5.1	8.3	11.5	1	0		1	100	0	1
41	81	52	0	1	3	1	4	5	1	1	6.3	9.4	13.4	1	0		1	100	0	1
41	82	52	0	1	3	1	4	5	2	4	6.3	9.6	13.3	1	0		1	100	0	1
41	82	52	0	1	3	1	4	5	2	3	14.3	20.4	23	1	0		2	60	0	2
41	82	52	0	1	3	1	4	5	2	1	12.5	17.2	22	1	0		2	70	0	2
41	82	52	0	1	3	1	4	5	2	2	9.4	14.5	19.5	1	0		1	90	0	2
42	83	22	0	1	2	2	3	3	1	1	5.4	8.5	11.1	1	0		1	100	0	1
42	83	22	0	1	2	2	3	3	1	3	9.3	14.3	16	1	0		2	80	2	2
42	83	22	0	1	2	2	3	3	1	4	5.5	8.4	12.3	1	0		1	100	0	1
42	83	22	0	1	2	2	3	3	1	2	6.4	10.3	14.4	1	0		1	100	0	1
42	84	22	0	1	2	2	3	3	2	1	14.3	20.2	25.4	2	0	1	2	60	0	3
42	84	22	0	1	2	2	3	3	2	4	7.3	11.5	14	1	0		1	100	0	1
42	84	22	0	1	2	2	3	3	2	2	8.4	15.5	19.4	1	0		2	80	0	1
42	84	22	0	1	2	2	3	3	2	3	14.3	18.4	22.1	1	0		2	50	0	2
43	85	26	0	1	3	2	4	4	1	2	3.5	9.4	12.5	1	0		1	100	0	1
43	85	26	0	1	3	2	4	4	1	3	7.35	11.4	14.5	1	0		1	100	0	1
43	85	26	0	1	3	2	4	4	1	4	7.4	11.4	14.3	1	0		1	100	0	2
43	85	26	0	1	3	2	4	4	1	1	5.3	8.4	12	1	0		1	90	0	1
43	86	26	0	1	3	2	4	4	2	4	6.5	10.2	14.6	1	0		2	80	0	1
43	86	26	0	1	3	2	4	4	2	2	7.4	12.5	16.1	1	0		1	90	0	1
43	86	26	0	1	3	2	4	4	2	3	14.5	24.2	29.5	2	0	1	2	50	0	3
43	86	26	0	1	3	2	4	4	2	1	13.1	18.5	24.2	1	0		2	60	0	2
44	87	40	0	1	3	1	4	4	1	1	5.3	9.1	13.4	1	0		1	100	0	1
44	87	40	0	1	3	1	4	4	1	2	6.4	10.1	14.2	1	0		1	100	0	1
44	87	40	0	1	3	1	4	4	1	3	5.5	9	13.1	1	0		1	100	0	1
44	87	40	0	1	3	1	4	4	1	4	6.2	10.5	15	1	0		1	100	0	1
44	88	40	0	1	3	1	4	4	2	3	16.2	25.1	34.2	2	0	1	2	20	0	3
44	88	40	0	1	3	1	4	4	2	4	5.5	9.1	12.4	1	0		1	90	0	1
44	88	40	0	1	3	1	4	4	2	1	11.3	17.3	22.1	1	0		2	50	0	2
44	88	40	0	1	3	1	4	4	2	2	7.4	12.4	16.2	1	0		2	80	0	1
45	89	10	0	1	2	2	3	3	1	2	7.5	13.4	18.4	1	0		1	100	0	1
45	89	10	0	1	2	2	3	3	1	1	5.5	11	16.4	1	0		1	90	2	1
45	89	10	0	1	2	2	3	3	1	4	7.3	12.4	15.2	1	0		1	90	0	3
45	89	10	0	1	2	2	3	3	1	3	4.55	9.3	13.5	1	0		1	100	0	1
45	90	10	0	1	2	2	3	3	2	2	9.3	15.5	21	1	0		1	90	0	1
45	90	10	0	1	2	2	3	3	2	1	16.2	26.1	30.4	2	0	1	2	20	0	3
45	90	10	0	1	2	2	3	3	2	4	6.5	10.1	13.2	1	0		1	90	0	1
45	90	10	0	1	2	2	3	3	2	3	15.2	24.3	28.5	1	0		2	40	0	3
46	91	33	0	1	3	1	4	4	1	1	5	9	12	1	0		1	100	0	1
46	91	33	0	1	3	1	4	4	1	3	7	12	15	1	0		2	80	2	1
46	91	33	0	1	3	1	4	4	1	2	5.3	11.5	15.2	1	0		1	100	0	1
46	91	33	0	1	3	1	4	4	1	4	6.2	9.5	12.5	1	0		1	100	0	2
46	92	33	0	1	3	1	4	4	2	2	7.45	12.4	15.1	1	0		1	90	0	1
46	92	33	0	1	3	1	4	4	2	4	5.5	9.1	13.1	1	0		1	100	0	1
46	92	33	0	1	3	1	4	4	2	1	14.1	18.2	25.2	1	0		2	30	0	3
46	92	33	0	1	3	1	4	4	2	3	16.3	25.2	33	2	0	2	2	20	0	3
47	93	8	0	1	1	2	2	2	1	1	10	16	20	1	0		1	90	0	1
47	93	8	0	1	1	2	2	2	1	4	5.5	9	13.5	1	0		1	90	0	3
47	93	8	0	1	1	2	2	2	1	3	7.3	11.3	14.5	1	0		1	100	0	1
47	93	8	0	1	1	2	2	2	1	2	3.5	12	16.2	1	0		1	100	0	1
47	94	8	0	1	1	2	2	2	2	2	6.4	10	14.3	1	0		1	90	0	1
47	94	8	0	1	1	2	2	2	2	4	5	8.1	12.4	1	0		1	100	0	1
47	94	8	0	1	1	2	2	2	2	3	15.3	27.1	34	1	0		2	20	0	3
47	94	8	0	1	1	2	2	2	2	1	7.1	10.3	13.5	1	0		1	90	0	1
48	95	36	0	1	3	1	4	4	1	3	6.5	11.3	14.5	1	0		1	100	0	1
48	95	36	0	1	3	1	4	4	1	1	7	10	15.6	1	0		2	80	2	1
48	95	36	0	1	3	1	4	4	1	2	4.3	9.1	12.5	1	0		1	90	0	1
48	95	36	0	1	3	1	4	4	1	4	6	10.3	15	1	0		1	100	0	1
48	96	36	0	1	3	1	4	4	2	1	13.2	17.4	23.2	2	0	1	2	50	0	3
48	96	36	0	1	3	1	4	4	2	2	4	10	15	1	0		1	100	0	1
48	96	36	0	1	3	1	4	4	2	4	6.1	10.3	15	1	0		1	100	0	1
48	96	36	0	1	3	1	4	4	2	3	15.3	24.1	29	1	0		2	40	0	3
49	97	24	0	1	2	1	4	4	1	2	3.55	10.1	18.1	1	0		1	100	0	1
49	97	24	0	1	2	1	4	4	1	3	7.2	15.1	21.2	1	0		1	90	0	2
49	97	24	0	1	2	1	4	4	1	1	7.3	13.5	20.4	1	0		2	80	0	2
49	97	24	0	1	2	1	4	4	1	4	3.1	14.2	20.1	1	0		1	100	0	1
49	98	24	0	1	2	1	4	4	2	1	17	34	39	1	0		2	60	0	3
49	98	24	0	1	2	1	4	4	2	4	6.4	14.5	29	1	0		1	100	0	1
49	98	24	0	1	2	1	4	4	2	3	21	31	39	1	0		2	50	0	3
49	98	24	0	1	2	1	4	4	2	2	5	18.8	26.4	1	0		1	100	0	1
50	99	6	0	1	1	1	3	3	1	2	4.2	12.4	18	1	0		1	100	0	1
50	99	6	0	1	1	1	3	3	1	1	5	12	19	1	0		2	80	2	2
50	99	6	0	1	1	1	3	3	1	3	7.3	13.4	18	1	0		1	90	0	2
50	99	6	0	1	1	1	3	3	1	4	5	13	18	1	0		1	90	0	1
50	100	6	0	1	1	1	3	3	2	1	11	18	25	1	0		2	80	0	2
50	100	6	0	1	1	1	3	3	2	4	8.1	14	21	1	0		1	100	0	1
50	100	6	0	1	1	1	3	3	2	2	4.2	12	19.3	1	0		1	100	0	1
50	100	6	0	1	1	1	3	3	2	3	6.4	15	20.3	1	0		1	90	0	1
51	101	32	0	1	3	1	4	4	1	4	5.2	9.3	13.4	1	0		1	100	0	3
51	101	32	0	1	3	1	4	4	1	2	6.2	10.1	14.1	1	0		1	100	0	1
51	101	32	0	1	3	1	4	4	1	1	7.2	11.2	14.3	1	0		1	90	0	1
51	101	32	0	1	3	1	4	4	1	3	3.5	8.4	12.1	1	0		1	100	0	1
51	102	32	0	1	3	1	4	4	2	4	6	9.4	12.1	1	0		1	100	0	1
51	102	32	0	1	3	1	4	4	2	3	14.2	20.3	25.2	1	0		2	40	0	3
51	102	32	0	1	3	1	4	4	2	2	9.3	15.2	20.2	1	0		1	90	0	1
51	102	32	0	1	3	1	4	4	2	1	10.2	19.2	24.3	2	0	1	2	30	0	3
52	103	37	0	1	2	2	4	4	1	3	4.1	12.1	18.2	1	0		2	80	0	2
52	103	37	0	1	2	2	4	4	1	2	3.1	9	12	1	0		1	100	0	1
52	103	37	0	1	2	2	4	4	1	4	3.04	8	15.2	1	0		1	100	0	2
52	103	37	0	1	2	2	4	4	1	1	5.3	9.4	14.1	1	0		2	80	0	1
52	104	37	0	1	2	2	4	4	2	3	9.4	18.1	25.2	1	0		2	60	0	2
52	104	37	0	1	2	2	4	4	2	1	5.3	12.4	16.4	1	0		2	80	0	2
52	104	37	0	1	2	2	4	4	2	4	2.4	10.4	14.3	1	0		1	100	0	1
52	104	37	0	1	2	2	4	4	2	2	2.3	11.5	17	1	0		1	100	0	1
53	105	68	0	2	4	1	4	5	1	1	5.4	10.1	13.2	1	0		1	90	0	1
53	105	68	0	2	4	1	4	5	1	3	6.4	11.3	15.2	1	0		1	100	0	1
53	105	68	0	2	4	1	4	5	1	4	3.3	7.4	10.3	1	0		1	90	0	3
53	105	68	0	2	4	1	4	5	1	2	4.4	9.3	13.1	1	0		1	100	0	1
53	106	68	0	2	4	1	4	5	2	2	6.4	13.2	18.2	1	0		1	90	0	1
53	106	68	0	2	4	1	4	5	2	3	13.4	20.4	28.2	2	0	1	2	30	0	3
53	106	68	0	2	4	1	4	5	2	1	9.5	16.1	24.3	1	0		1	90	0	3
53	106	68	0	2	4	1	4	5	2	4	5.3	9.5	12.4	1	0		1	100	0	1
54	107	21	0	1	2	2	4	3	1	1	7.3	14.1	17.1	1	0		1	100	0	1
54	107	21	0	1	2	2	4	3	1	2	3.5	9	13.1	1	0		1	100	0	1
54	107	21	0	1	2	2	4	3	1	4	5.3	8.4	12.1	1	0		1	100	0	1
54	107	21	0	1	2	2	4	3	1	3	8.4	13.1	17.1	1	0		1	100	0	1
54	108	21	0	1	2	2	4	3	2	3	10.4	16.4	22.2	1	0		2	80	0	2
54	108	21	0	1	2	2	4	3	2	4	3.4	8.4	12.1	1	0		1	100	0	1
54	108	21	0	1	2	2	4	3	2	1	9.4	16.4	22.2	1	0		2	40	0	1
54	108	21	0	1	2	2	4	3	2	2	8.4	14.5	20.1	1	0		1	90	0	1
55	109	6	0	1	1	1	2	3	1	1	7.4	10.4	16.4	1	0		1	100	0	2
55	109	6	0	1	1	1	2	3	1	2	3.4	12.4	19.4	1	0		1	100	0	1
55	109	6	0	1	1	1	2	3	1	4	4.3	10.2	15.2	1	0		1	100	0	1
55	109	6	0	1	1	1	2	3	1	3	5.3	10.4	19.1	1	0		2	60	0	4
55	110	6	0	1	1	1	2	3	2	4	5.3	10.2	15.2	1	0		1	100	0	1
55	110	6	0	1	1	1	2	3	2	1	12.1	20.3	26.2	1	0		2	60	0	2
55	110	6	0	1	1	1	2	3	2	3	13	24	29	2	0	1	3	0	0	4
55	110	6	0	1	1	1	2	3	2	2	6.5	10.4	16.4	1	0		1	100	0	1
56	111	24	0	1	2	1	4	4	1	4	6.4	8.5	10.4	1	0		1	100	0	2
56	111	24	0	1	2	1	4	4	1	2	7.5	11.4	14.3	1	0		1	100	0	1
56	111	24	0	1	2	1	4	4	1	3	8.2	12.4	15.2	1	0		1	100	0	1
56	111	24	0	1	2	1	4	4	1	1	5.2	10.4	15	1	0		1	90	1	2
56	112	24	0	1	2	1	4	4	2	3	15.2	24.3	32	1	0		2	30	0	3
56	112	24	0	1	2	1	4	4	2	1	14.1	20.2	24.5	1	0		2	30	0	3
56	112	24	0	1	2	1	4	4	2	4	7.4	10.3	13.4	1	0		1	100	0	1
56	112	24	0	1	2	1	4	4	2	2	4.5	10.1	15.1	1	0		1	100	0	1
57	113	84	0	2	3	1	4	5	1	3	13.1	26.4	33.4	2	0	1	2	20	1.2	3
57	113	84	0	2	3	1	4	5	1	4	3.5	8.4	13.1	1	0		1	100	0	1
57	113	84	0	2	3	1	4	5	1	1	3.4	8.5	14.3	1	0		1	90	0	2
57	113	84	0	2	3	1	4	5	1	2	4.4	16.2	21	1	0		1	90	0	1
57	114	84	0	2	3	1	4	5	2	4	4.08	8.4	15.2	1	0		1	90	0	2
57	114	84	0	2	3	1	4	5	2	3	10.4	16.4	21.5	1	0		2	50	0	3
57	114	84	0	2	3	1	4	5	2	2	7	15.3	22.5	1	0		2	60	0	1
57	114	84	0	2	3	1	4	5	2	1	5.3	12.1	16.1	1	0		1	90	0	2
58	115	37	0	1	3	1	4	4	1	4	5.3	9.2	12.4	1	0		1	100	0	2
58	115	37	0	1	3	1	4	4	1	2	7.3	10.4	15.2	1	0		1	90	0	1
58	115	37	0	1	3	1	4	4	1	1	10.4	15.3	19.4	1	0		1	90	1	1
58	115	37	0	1	3	1	4	4	1	3	8.2	14.2	20.1	1	0		1	90	0	2
58	116	37	0	1	3	1	4	4	2	1	10.3	16.4	22.4	1	0		2	60	0	3
58	116	37	0	1	3	1	4	4	2	2	9.4	15.4	20.1	1	0		2	70	0	2
58	116	37	0	1	3	1	4	4	2	4	3.4	15.1	19.4	1	0		1	90	0	2
58	116	37	0	1	3	1	4	4	2	3	9.4	17.4	23.5	1	0		2	60	0	3
59	117	40	180	2	4	1	4	5	1	4	2.4	8.4	13.2	1	0		1	100	0	1
59	117	40	180	2	4	1	4	5	1	2	2.4	9	14.3	1	0		1	100	0	1	better view
59	117	40	180	2	4	1	4	5	1	3	7.2	10.3	15.4	1	0		2	80	0	3
59	117	40	180	2	4	1	4	5	1	1	5.3	8.4	10.4	1	0		1	100	0	2
59	118	40	180	2	4	1	4	5	2	1	6.4	12.4	15.3	1	0		2	60	0	3
59	118	40	180	2	4	1	4	5	2	4	2.4	8.1	12	1	0		1	90	0	1
59	118	40	180	2	4	1	4	5	2	2	5.3	10.4	15.1	1	0		2	70	0	2
59	118	40	180	2	4	1	4	5	2	3	4.5	8.4	13.4	1	0		2	70	0	3
60	119	10	30	2	4	1	4	5	1	4	3.2	11.2	15	1	0		1	90	0	2
60	119	10	30	2	4	1	4	5	1	2	5.2	10.2	14.1	1	0		1	100	0	1
60	119	10	30	2	4	1	4	5	1	1	5.2	9.4	12.1	1	0		1	100	0	2
60	119	10	30	2	4	1	4	5	1	3	7.4	12.4	14.2	1	0		1	90	0	2
60	120	10	30	2	4	1	4	5	2	4	8.4	15.2	18.4	1	0		2	50	0	3
60	120	10	30	2	4	1	4	5	2	3	8.4	18.4	23.2	1	0		2	70	0	2
60	120	10	30	2	4	1	4	5	2	2	11.7	26.2	32	1	0		2	70	0	3
60	120	10	30	2	4	1	4	5	2	1	8.4	17.2	23.02	1	0		3	0	0	4
61	1	0	64	2	4	1	4	4	1	4	7.2	15.2	19.2	1	0		1	90	0	2
61	1	0	64	2	4	1	4	4	1	3	10.2	14.3	17.3	1	0		1	100	0	2
61	1	0	64	2	4	1	4	4	1	1	9.4	14.3	16.4	1	0		1	100	0	1
61	1	0	64	2	4	1	4	4	1	2	5.2	11.1	14.3	1	0		1	100	0	1
61	2	0	64	2	4	1	4	4	2	2	10	16.2	19.4	1	0		1	100	0	1
61	2	0	64	2	4	1	4	4	2	3	9	13.2	20.4	2	0	1	3	0	0	3
61	2	0	64	2	4	1	4	4	2	1	7.4	11.4	16.4	1	0		2	50	0	2
61	2	0	64	2	4	1	4	4	2	4	3.2	8.4	13.2	1	0		1	100	0	2
62	3	0	36	2	4	1	4	4	1	1	6.4	10.3	14.2	1	0		1	90	0	1
62	3	0	36	2	4	1	4	4	1	2	10.1	15	20.1	1	0		1	100	0	1
62	3	0	36	2	4	1	4	4	1	3	7.2	10.2	14.3	1	0		1	100	0	1
62	3	0	36	2	4	1	4	4	1	4	5.4	10.2	14.3	1	0		1	100	0	2
62	4	0	36	2	4	1	4	4	2	4	3.6	8.4	12.1	1	0		1	100	0	1
62	4	0	36	2	4	1	4	4	2	2	6.4	10.3	15	1	0		1	100	0	1
62	4	0	36	2	4	1	4	4	2	3	14.1	17.1	20.1	1	0		2	40	0	3
62	4	0	36	2	4	1	4	4	2	1	12.1	16.4	20.4	1	0		1	90	0	3
63	5	0	24	1	4	1	3	3	1	1	6.4	10.1	13.1	1	0		1	90	0	2
63	5	0	24	1	4	1	3	3	1	3	8.4	14.1	18.2	1	0		1	90	0	1
63	5	0	24	1	4	1	3	3	1	4	4	7.6	10.1	1	0		1	100	0	1
63	5	0	24	1	4	1	3	3	1	2	6.4	9.6	13.4	1	0		1	100	0	1
63	6	0	24	1	4	1	3	3	2	4	6.5	10.3	14.5	1	0		1	100	0	1
63	6	0	24	1	4	1	3	3	2	2	8.5	10.2	21	2	0	2	2	60	0	3
63	6	0	24	1	4	1	3	3	2	3	7.5	11.1	15.4	2	0	2	2	40	0	3
63	6	0	24	1	4	1	3	3	2	1	10.3	24.3	31	1	0		2	60	0	2
64	7	0	120	2	4	1	4	4	1	1	3.4	10.4	13.2	1	0		1	100	0	2
64	7	0	120	2	4	1	4	4	1	4	2.8	10.6	14.3	1	0		1	100	0	2
64	7	0	120	2	4	1	4	4	1	3	9.4	14.3	18.2	1	0		2	60	0	4
64	7	0	120	2	4	1	4	4	1	2	8.2	13.2	16.2	1	0		1	100	0	2
64	8	0	120	2	4	1	4	4	2	2	6	9	14	1	0		1	100	0	1
64	8	0	120	2	4	1	4	4	2	3	8.5	15.4	22.4	1	0		2	60	0	3
64	8	0	120	2	4	1	4	4	2	1	11.5	16.5	20.4	1	0		1	100	0	2
64	8	0	120	2	4	1	4	4	2	4	3.4	8.5	15.4	1	0		1	100	0	1
65	9	0	108	2	4	1	4	4	1	3	4.6	7.2	13	1	0		2	60	0	4
65	9	0	108	2	4	1	4	4	1	1	4	6.3	15	1	0		1	100	0	2
65	9	0	108	2	4	1	4	4	1	2	10	14	19	2	0	1	1	100	0	2
65	9	0	108	2	4	1	4	4	1	4	6.4	9.3	10.3	1	0		1	100	0	3
65	10	0	108	2	4	1	4	4	2	4	2.6	10.1	14.3	1	0		1	100	0	3
65	10	0	108	2	4	1	4	4	2	2	4	10.2	15.2	1	0		1	100	0	3
65	10	0	108	2	4	1	4	4	2	3	8.3	16.4	20.4	1	0		2	50	0	3
65	10	0	108	2	4	1	4	4	2	1	7.4	12.1	15.1	1	0		1	100	0	2
66	11	0	6	1	2	1	2	2	1	1	5.1	11.4	14.4	1	0		1	100	0	1
66	11	0	6	1	2	1	2	2	1	2	6.3	15.6	20.1	1	0		1	100	0	4
66	11	0	6	1	2	1	2	2	1	3	6.4	10.3	15.1	1	0		2	70	0	1
66	11	0	6	1	2	1	2	2	1	4	3.4	13	17	1	0		1	100	0	2
66	12	0	6	1	2	1	2	2	2	3	9	13.4	20.3	1	0		3	0	0	3
66	12	0	6	1	2	1	2	2	2	1	9.4	13.2	18.4	1	0		2	60	0	2
66	12	0	6	1	2	1	2	2	2	2	7.4	13.4	18.4	1	0		1	100	0	1
66	12	0	6	1	2	1	2	2	2	4	6.5	13.4	16.2	1	0		1	100	0	2
67	13	0	24	1	2	1	2	3	1	3	5.2	8.4	18.4	1	0		1	100	0	2
67	13	0	24	1	2	1	2	3	1	4	6.2	13.4	18	1	0		2	80	0	2
67	13	0	24	1	2	1	2	3	1	1	4	10	14	1	0		1	90	0	2
67	13	0	24	1	2	1	2	3	1	2	7.4	14.3	17.5	1	0		1	100	0	2
67	14	0	24	1	2	1	2	3	2	2	8.4	14.3	20.2	1	0		1	100	0	3	unhandlich, schwer in der Hand
67	14	0	24	1	2	1	2	3	2	4	8.4	10.4	15.1	1	0		1	100	0	2
67	14	0	24	1	2	1	2	3	2	3	8.6	14.4	18.4	1	0		1	100	0	2
67	14	0	24	1	2	1	2	3	2	1	4.3	10.3	19.5	1	0		2	80	0	2
68	15	0	96	2	4	1	4	3	1	2	9	14	18	1	0		1	90	0	3
68	15	0	96	2	4	1	4	3	1	1	5.4	12.4	15	1	0		1	100	0	2
68	15	0	96	2	4	1	4	3	1	3	6	10	15	1	0		2	50	0	5
68	15	0	96	2	4	1	4	3	1	4	4	10.1	16.1	1	0		1	90	0	1
68	16	0	96	2	4	1	4	3	2	2	10	19	25	2	0	1	2	80	0	3
68	16	0	96	2	4	1	4	3	2	1	5	11	16	1	0		1	100	0	2
68	16	0	96	2	4	1	4	3	2	3	8	20	26	1	0		2	50	0	3
68	16	0	96	2	4	1	4	3	2	4	4	10.1	19.3	1	0		1	100	0	2
69	17	96	0	2	4	1	4	5	1	2	6.4	10.4	18.4	1	0		1	100	0	2
69	17	96	0	2	4	1	4	5	1	1	5	9	14.3	1	0		1	100	0	2
69	17	96	0	2	4	1	4	5	1	4	2.4	6.4	12.4	1	0		1	100	0	1
69	17	96	0	2	4	1	4	5	1	3	3.1	9	15	1	0		1	90	0	4
69	18	96	0	2	4	1	4	5	2	1	5.3	9.4	15.2	1	0		2	80	0	2
69	18	96	0	2	4	1	4	5	2	2	9.1	15.1	20.1	1	0		1	100	0	1
69	18	96	0	2	4	1	4	5	2	3	11.2	16.2	20.3	1	0		2	10	0	5
69	18	96	0	2	4	1	4	5	2	4	3.2	8.2	13.1	1	0		1	90	0	2
70	19	0	24	1	3	1	2	2	1	1	5.2	9	14.5	1	0		1	100	0	1
70	19	0	24	1	3	1	2	2	1	2	3.2	10.3	15.2	1	0		1	100	0	1
70	19	0	24	1	3	1	2	2	1	3	7.5	13.3	16.1	1	0		1	100	0	2
70	19	0	24	1	3	1	2	2	1	4	3.1	7.4	11.5	1	0		1	100	0	2
70	20	0	24	1	3	1	2	2	2	2	8.4	15.1	20.2	2	0	2	2	70	0	3
70	20	0	24	1	3	1	2	2	2	3	10.5	20.4	26.3	1	0		1	50	0	3
70	20	0	24	1	3	1	2	2	2	1	9.2	17.4	23.1	1	0		2	40	0	3
70	20	0	24	1	3	1	2	2	2	4	7.2	12.5	16.4	1	0		1	90	0	1
71	1	0	42	2	3	1	4	3	1	4	3.5	8.1	11.4	1	0		1	90	0	3
71	1	0	42	2	3	1	4	3	1	1	6.05	10.4	14.5	1	0		1	100	0	1
71	1	0	42	2	3	1	4	3	1	2	4.5	10.1	15.3	1	0		1	100	0	1
71	1	0	42	2	3	1	4	3	1	3	5.5	9.3	16.1	1	0		1	100	0	1
71	2	0	42	2	3	1	4	3	2	3	13.1	23.4	28.5	2	0	2	2	40	0	3
71	2	0	42	2	3	1	4	3	2	2	7.3	15.4	23.1	1	0		1	90	0	2
71	2	0	42	2	3	1	4	3	2	4	6.4	10.2	14.1	1	0		1	100	0	1
71	2	0	42	2	3	1	4	3	2	1	7.1	14.1	18	3	2	1	2	80	0	1
72	3	0	22	1	2	1	2	2	1	3	8.5	14.5	20.1	1	0		1	100	0	2
72	3	0	22	1	2	1	2	2	1	2	3.5	8.4	10.4	1	0		1	100	0	1
72	3	0	22	1	2	1	2	2	1	4	4.1	8.5	11.5	1	0		1	100	0	2
72	3	0	22	1	2	1	2	2	1	1	5.2	9.5	14.1	1	0		1	100	0	1
72	4	0	22	1	2	1	2	2	2	3	14.2	25.2	31.3	2	0	1	2	40	0	3
72	4	0	22	1	2	1	2	2	2	4	5.2	9.2	13.4	1	0		1	100	0	1
72	4	0	22	1	2	1	2	2	2	2	8.2	14.2	20.1	1	0		1	100	0	2
72	4	0	22	1	2	1	2	2	2	1	10.3	24.1	29.4	2	0	2	2	30	0	3
73	5	0	36	2	4	1	4	3	1	3	8.4	14.5	17.4	1	0		1	100	1.2	2
73	5	0	36	2	4	1	4	3	1	2	4.1	9.5	12.4	1	0		1	100	0	1
73	5	0	36	2	4	1	4	3	1	1	6.2	10.5	14.5	1	0		2	80	0	1
73	5	0	36	2	4	1	4	3	1	4	3.1	8.4	12.5	1	0		1	100	0	1
73	6	0	36	2	4	1	4	3	2	4	5.2	9.5	14.5	1	0		1	100	0	1
73	6	0	36	2	4	1	4	3	2	1	12.5	23.4	30.5	2	0	1	2	20	0	3
73	6	0	36	2	4	1	4	3	2	3	10.3	27.4	37.2	1	0		2	20	0	3
73	6	0	36	2	4	1	4	3	2	2	7.8	17.5	24.5	1	0		2	60	0	3
74	7	0	20	1	2	1	2	2	1	2	6.4	11.3	16.2	1	0		1	100	0	1
74	7	0	20	1	2	1	2	2	1	3	9.2	15.2	21.3	1	0		1	100	0	2
74	7	0	20	1	2	1	2	2	1	1	5.3	8.4	14.2	1	0		1	100	0	1
74	7	0	20	1	2	1	2	2	1	4	4.5	10.3	13.2	1	0		1	100	1	1
74	8	0	20	1	2	1	2	2	2	2	9.1	14.2	19.1	1	0		2	80	0	2
74	8	0	20	1	2	1	2	2	2	3	11.4	18.5	27.4	2	0	1	2	40	0	3
74	8	0	20	1	2	1	2	2	2	1	8.5	16.3	22	1	0		2	50	0	3
74	8	0	20	1	2	1	2	2	2	4	6.4	10.5	16.4	1	0		1	100	0	1
75	9	30	0	1	3	1	4	4	1	4	5.1	9.1	13.4	1	0		1	100	0	2
75	9	30	0	1	3	1	4	4	1	1	6.2	10.4	15.1	1	0		1	100	0	1
75	9	30	0	1	3	1	4	4	1	3	4.3	9.5	14.2	1	0		1	100	0	1
75	9	30	0	1	3	1	4	4	1	2	5	10.2	14.2	1	0		1	100	0	1
75	10	30	0	1	3	1	4	4	2	2	8.1	16.2	20.2	2	0	2	2	60	0	2
75	10	30	0	1	3	1	4	4	2	4	7.4	11.2	14.5	1	0		1	90	0	1
75	10	30	0	1	3	1	4	4	2	3	11.4	20.5	26.2	1	0		2	60	0	3
75	10	30	0	1	3	1	4	4	2	1	8.5	15.4	22.2	1	0		2	70	0	2
76	11	28	0	1	3	1	3	3	1	3	5.4	10.4	15	1	0		1	100	0	2
76	11	28	0	1	3	1	3	3	1	2	3.4	8.5	12.2	1	0		1	100	0	1
76	11	28	0	1	3	1	3	3	1	4	4.1	9.4	13.3	1	0		1	100	0	1
76	11	28	0	1	3	1	3	3	1	1	5.3	10.5	14.5	1	0		2	80	0	2
76	12	28	0	1	3	1	3	3	2	1	13.5	20.3	27.2	2	0	1	2	40	0	2
76	12	28	0	1	3	1	3	3	2	4	7.3	12.3	17.5	1	0		1	90	0	1
76	12	28	0	1	3	1	3	3	2	2	8.5	15.4	20.2	1	0		2	70	0	2
76	12	28	0	1	3	1	3	3	2	3	14	27.2	36.4	1	0		2	40	0	3
77	13	18	0	1	2	2	2	3	1	1	6.2	10.5	14.3	1	0		1	100	0	1
77	13	18	0	1	2	2	2	3	1	4	3.5	11.2	13.5	1	0		1	100	0	2
77	13	18	0	1	2	2	2	3	1	2	4.1	10.3	12.5	1	0		1	100	0	1
77	13	18	0	1	2	2	2	3	1	3	6.5	12.2	14.5	1	0		1	100	0	2
77	14	18	0	1	2	2	2	3	2	4	6.4	10.4	13.2	1	0		1	100	0	1
77	14	18	0	1	2	2	2	3	2	2	7.4	14.5	19.2	1	0		1	100	0	2
77	14	18	0	1	2	2	2	3	2	3	14.5	24.3	30	1	0		2	30	0	3
77	14	18	0	1	2	2	2	3	2	1	12.3	19.4	26.3	1	0		2	40	0	3
78	15	44	0	1	3	1	4	4	1	1	6.4	10.5	14.1	1	0		1	90	1	1
78	15	44	0	1	3	1	4	4	1	3	7	11.2	14.2	1	0		1	100	0	2
78	15	44	0	1	3	1	4	4	1	2	4.3	9.2	14.5	1	0		1	100	0	1
78	15	44	0	1	3	1	4	4	1	4	4.2	8.5	12.4	1	0		1	100	0	2
78	16	44	0	1	3	1	4	4	2	4	6.3	10.5	13.5	1	0		1	90	0	1
78	16	44	0	1	3	1	4	4	2	2	4.3	10.5	15.6	1	0		1	90	0	2
78	16	44	0	1	3	1	4	4	2	1	11.2	22.4	29.2	1	0		2	40	0	3
78	16	44	0	1	3	1	4	4	2	3	12.5	21.3	28.5	1	0		2	20	0	3
79	17	120	0	2	4	1	4	5	1	1	4.2	8.3	12.1	1	0		1	90	0	1
79	17	120	0	2	4	1	4	5	1	4	3.4	8.4	12.1	1	0		1	100	0	1
79	17	120	0	2	4	1	4	5	1	3	3.2	7.4	10.5	1	0		1	100	0	2
79	17	120	0	2	4	1	4	5	1	2	6.4	10.1	14.2	1	0		1	100	0	2
79	18	120	0	2	4	1	4	5	2	2	5.4	10.4	14.3	1	0		1	90	0	1
79	18	120	0	2	4	1	4	5	2	3	13.4	24.5	32	2	0	2	2	20	0	4
79	18	120	0	2	4	1	4	5	2	4	6.4	9.4	12.4	1	0		1	90	0	1
79	18	120	0	2	4	1	4	5	2	1	8.4	15.4	23.1	2	0	1	2	40	0	2
80	19	16	0	1	2	2	3	3	1	1	6.4	10.1	14.1	1	0		1	100	0	1
80	19	16	0	1	2	2	3	3	1	4	3.5	8.1	11.5	1	0		1	90	0	2
80	19	16	0	1	2	2	3	3	1	3	8.4	14.5	17.4	1	0		1	100	0	1
80	19	16	0	1	2	2	3	3	1	2	5.3	9.4	13.4	1	0		1	100	0	1
80	20	16	0	1	2	2	3	3	2	2	8.3	13.4	16.1	1	0		1	90	0	1
80	20	16	0	1	2	2	3	3	2	3	13.4	18.1	24.2	1	0		2	40	0	3
80	20	16	0	1	2	2	3	3	2	1	9.3	15.4	20.5	1	0		2	60	0	2
80	20	16	0	1	2	2	3	3	2	4	7.5	13.4	16.1	1	0		1	100	0	1

## Sheet: Legend
KIVI-Studie
ID No	Random No	AN-Experience	PCCM Experience	Status	Exp. Ped.	Exp. Weight	Exp. VL	Exp. DL	Scenario	Device	TTBV	TTP	TTV	Success	Failure	Failure R	C&L	POGO	ELM	Lickert-Sc
		in Month	in Month	1=Resident or Fellow	1=<10	1=<5kg	1=<10	1=<50	1=normal	1= Mac				1=y	0=None	1=Time L			0=none
				2=Consultant	2=<50	2=<10kg	2=<25	2=<100	2=difficult	2= D-Blade				2=n	1=Mac	2=Remove			1=BURP
					3=<100	3=<20kg	3=<50	3=<500		3= Miller					2= KV	3=Oeso			2=Head position
					4=>100		4=>100	4=<1000		4= KV			L
								5=>1000
